# Supplementary material
Source: publisher figshare collection journal article supplement (https://acs.figshare.com/ndownloader/files/18154994)

**Supplementary Table 1.** Changes in atomic properties of Gly m 4 allergen.

| <b>Temperature</b> | <b>Pressure</b> | <b>RMSD (nm)</b> | <b>Rg (nm)</b> | <b>SASA (nm<sup>2</sup>)</b> |
|--------------------|-----------------|------------------|----------------|------------------------------|
| 300 K              | 1 bar           | 0.254±0.03       | 1.543±0.011    | 88.27±2.21                   |
|                    | 3 kbar          | 0.254±0.026      | 1.532±0.012    | 89.1±2.52                    |
|                    | 6 kbar          | 0.252±0.035      | 1.539±0.009    | 89.32±2.14                   |
| 345 K              | 1 bar           | 0.275±0.03       | 1.549±0.011    | 89.15±2.33                   |
|                    | 3 kbar          | 0.285±0.036      | 1.524±0.01     | 84.78±1.83                   |
|                    | 6 kbar          | 0.265±0.026      | 1.53±0.008     | 86.09±1.86                   |
| 373 K              | 1 bar           | 0.324±0.039      | 1.547±0.015    | 89.07±2.4                    |
|                    | 3 kbar          | 0.278±0.025      | 1.53±0.01      | 85.27±2.09                   |
|                    | 6 kbar          | 0.257±0.037      | 1.52±0.016     | 85.42±2.71                   |

**Supplementary Figure 1.** Ramachandran plot and integrated plot of Gly m 4 at different conditions: (a) 300 K, 1 bar; (b) 300 K, 3 kbar; (c) 345 K, 1 bar; (d) 345 K, 3 kbar; (e) 345 K, 6 kbar; (f) 373 K, 1 bar; (g) 373 K, 3 kbar; (h) 373 K, 6 kbar.

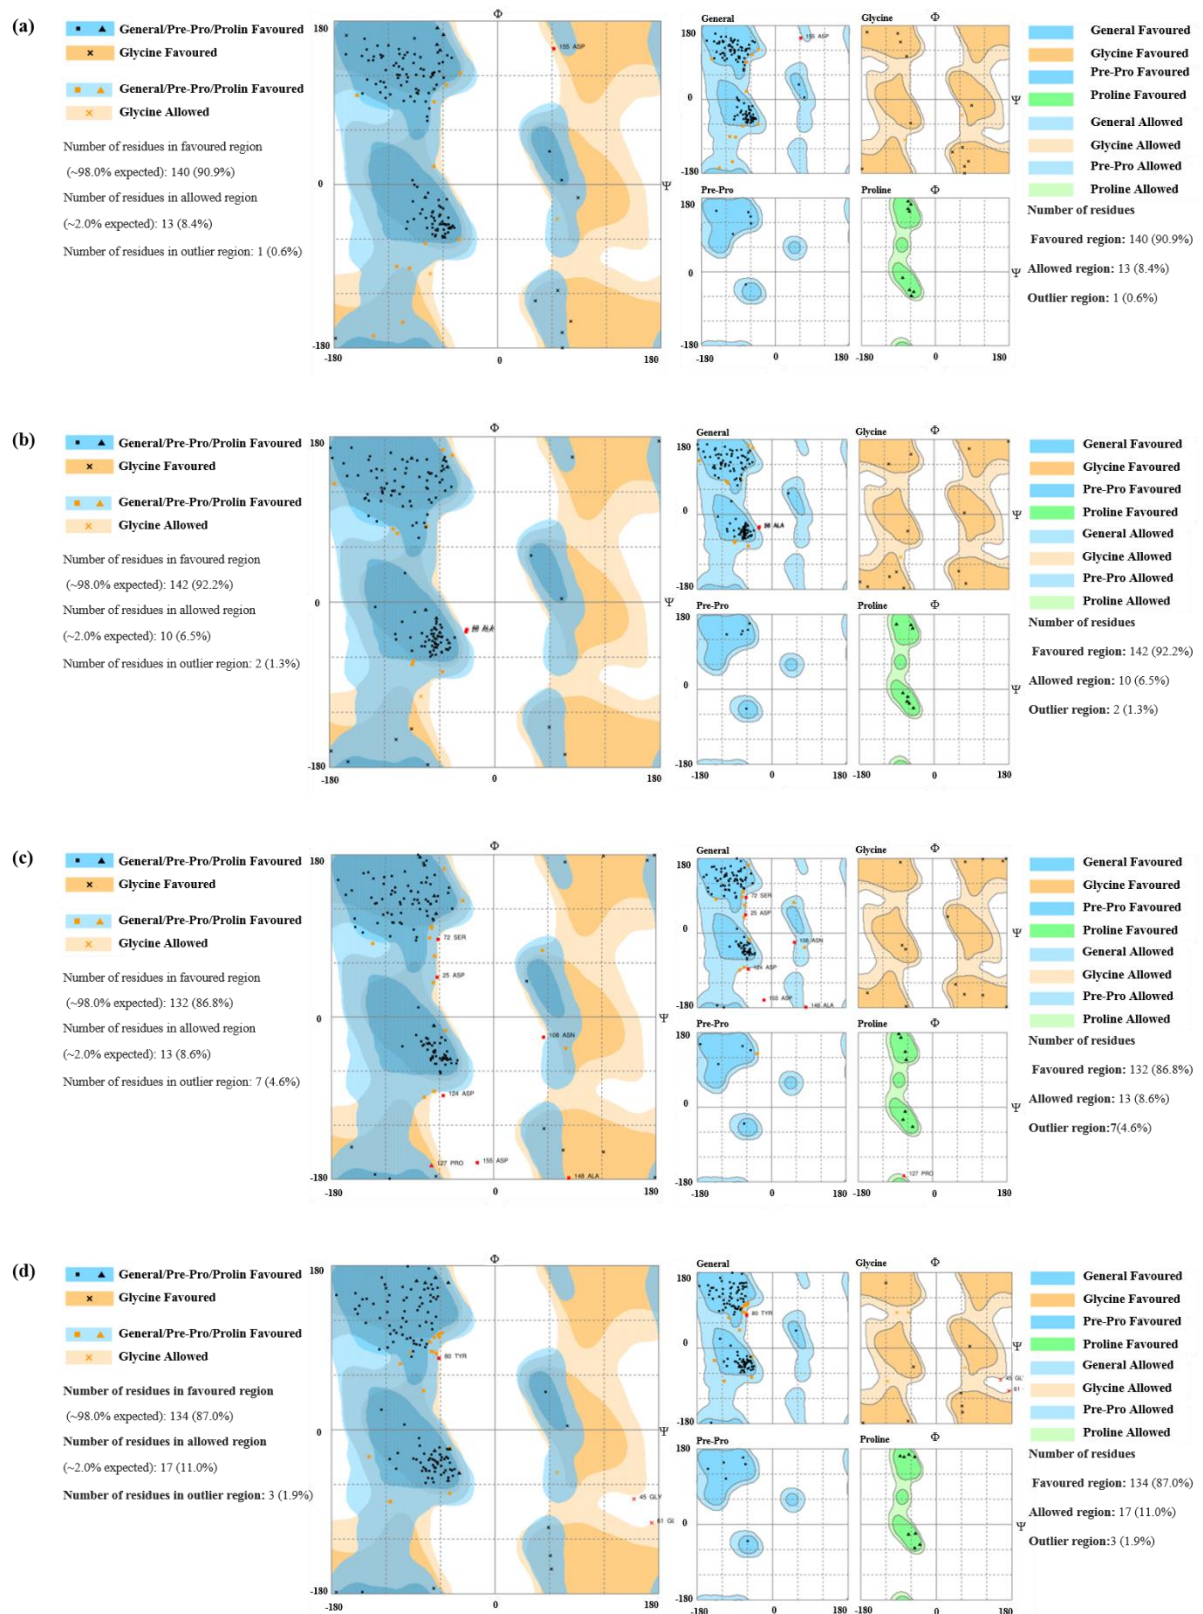

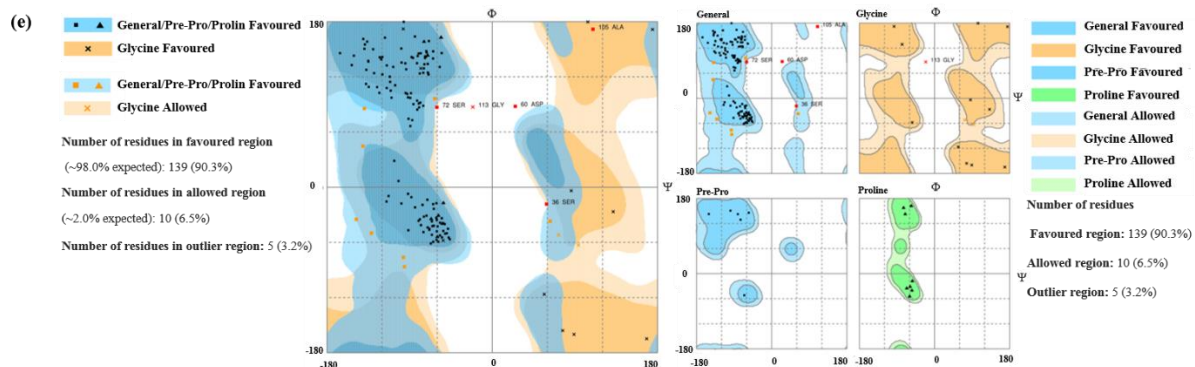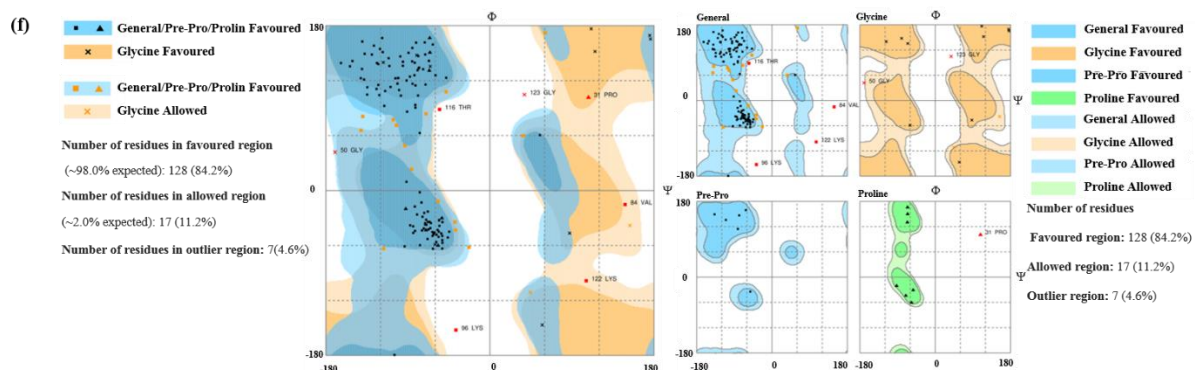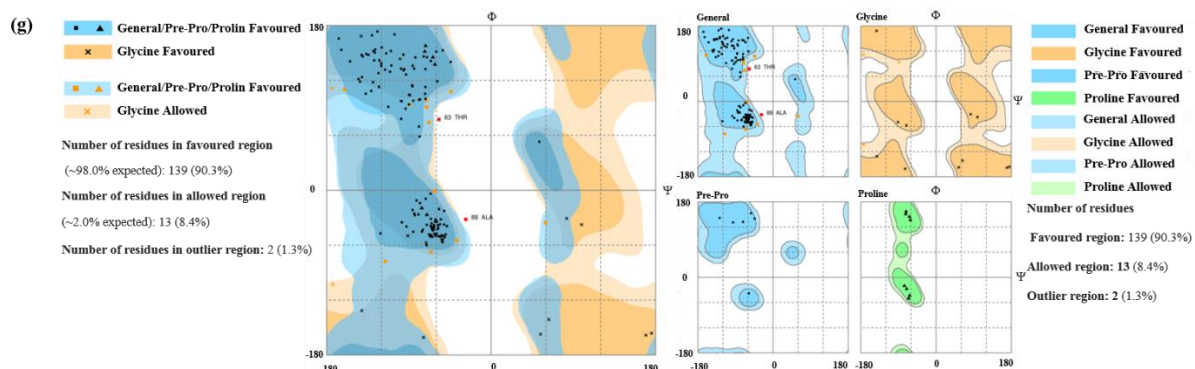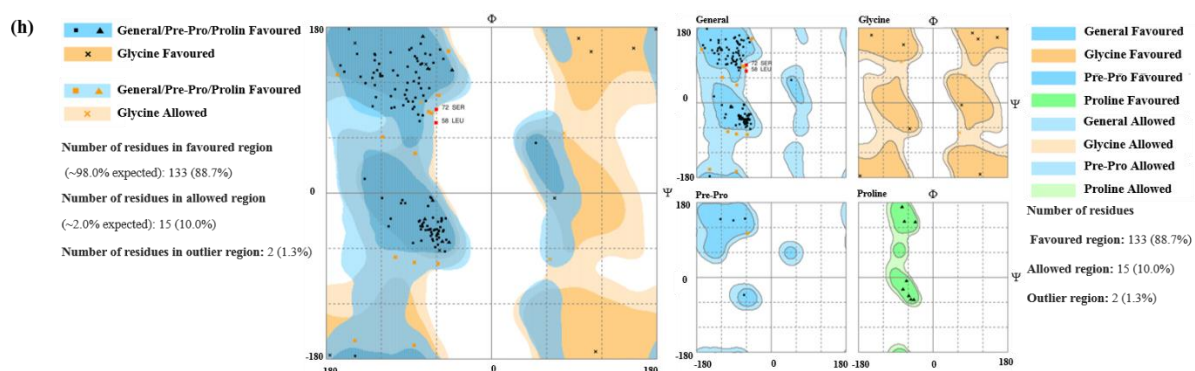



**Supplementary Figure 2.** Similar progression of Rg and SASA of Gly m 4 allergen at 300 K and 6 kbar.

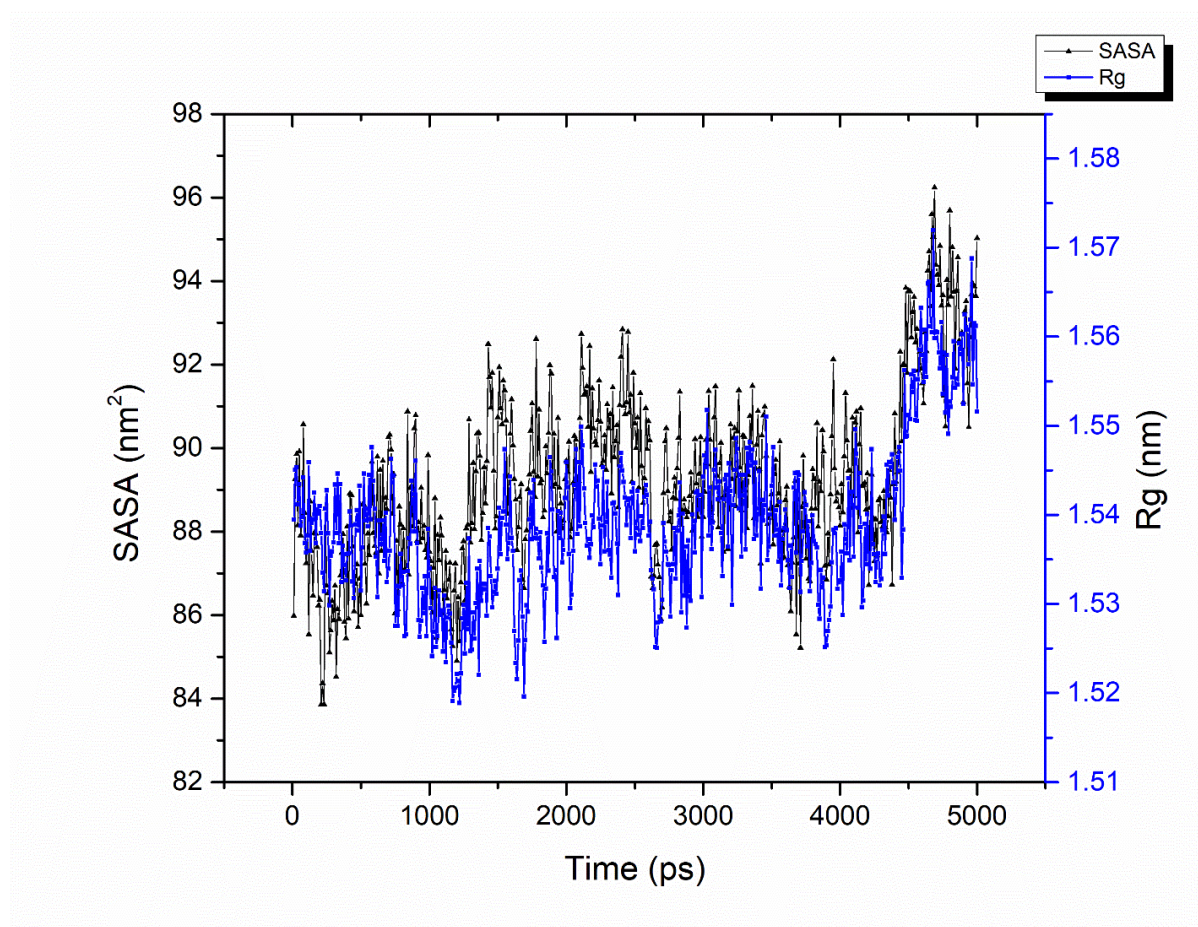

Supplement: Supplementary file 1 [file 18154994]
